# Supplementary material
Source: PubMed Central journal article supplement (PMC9949733)

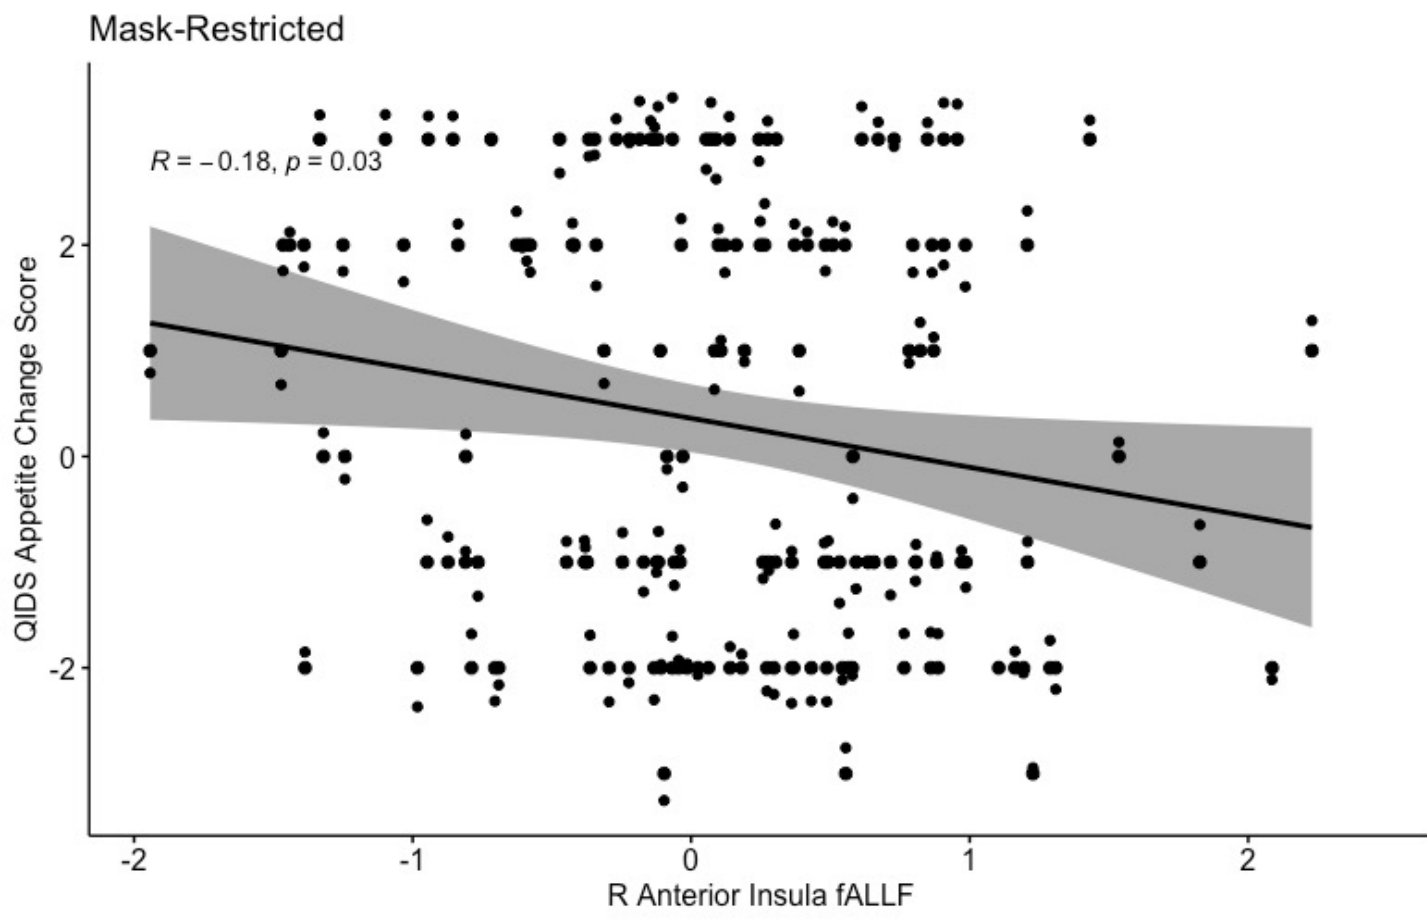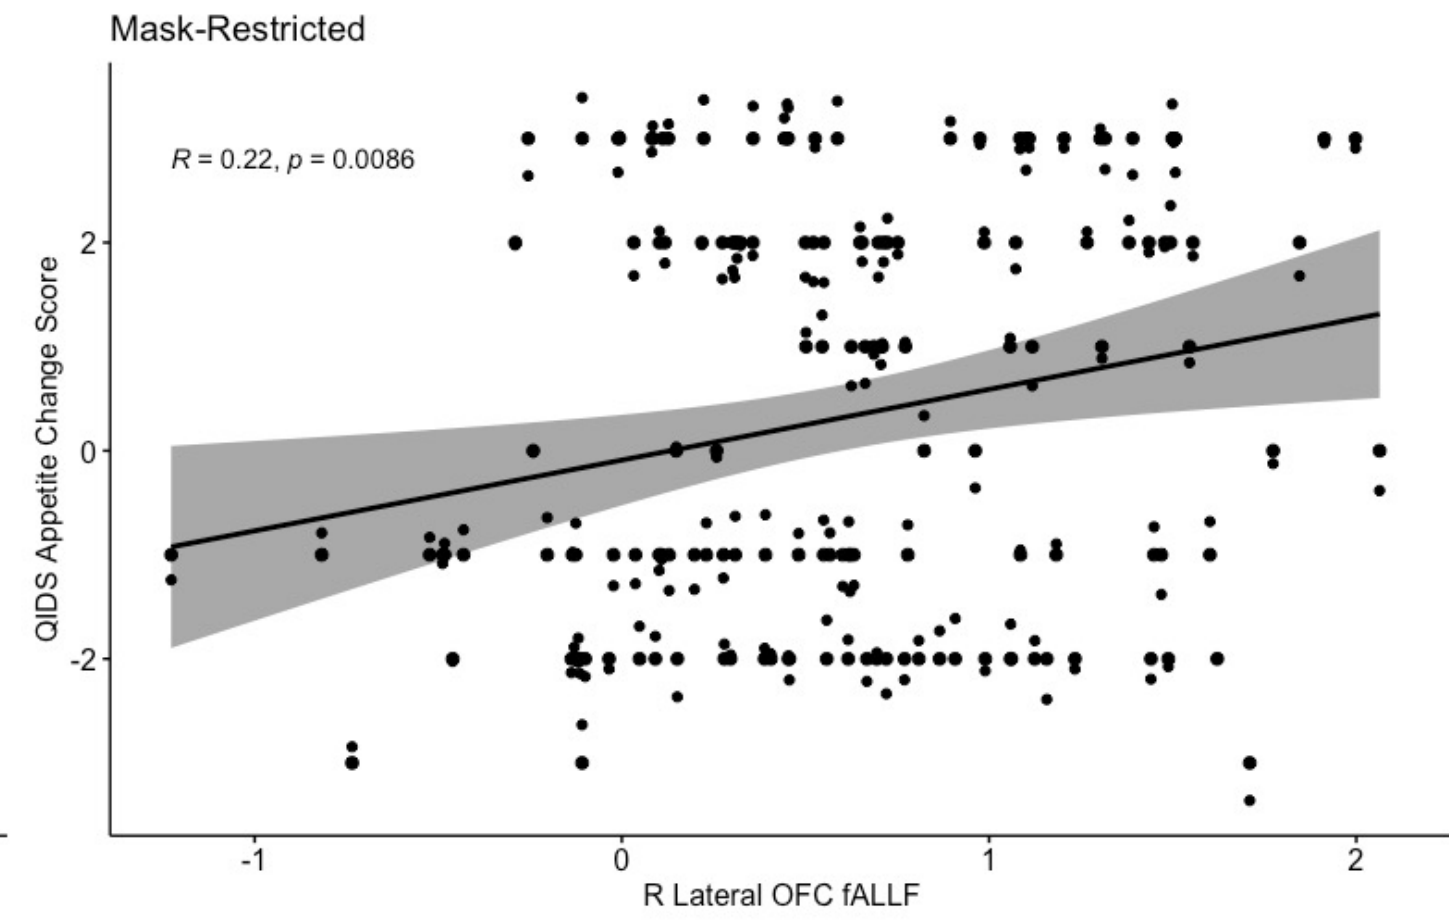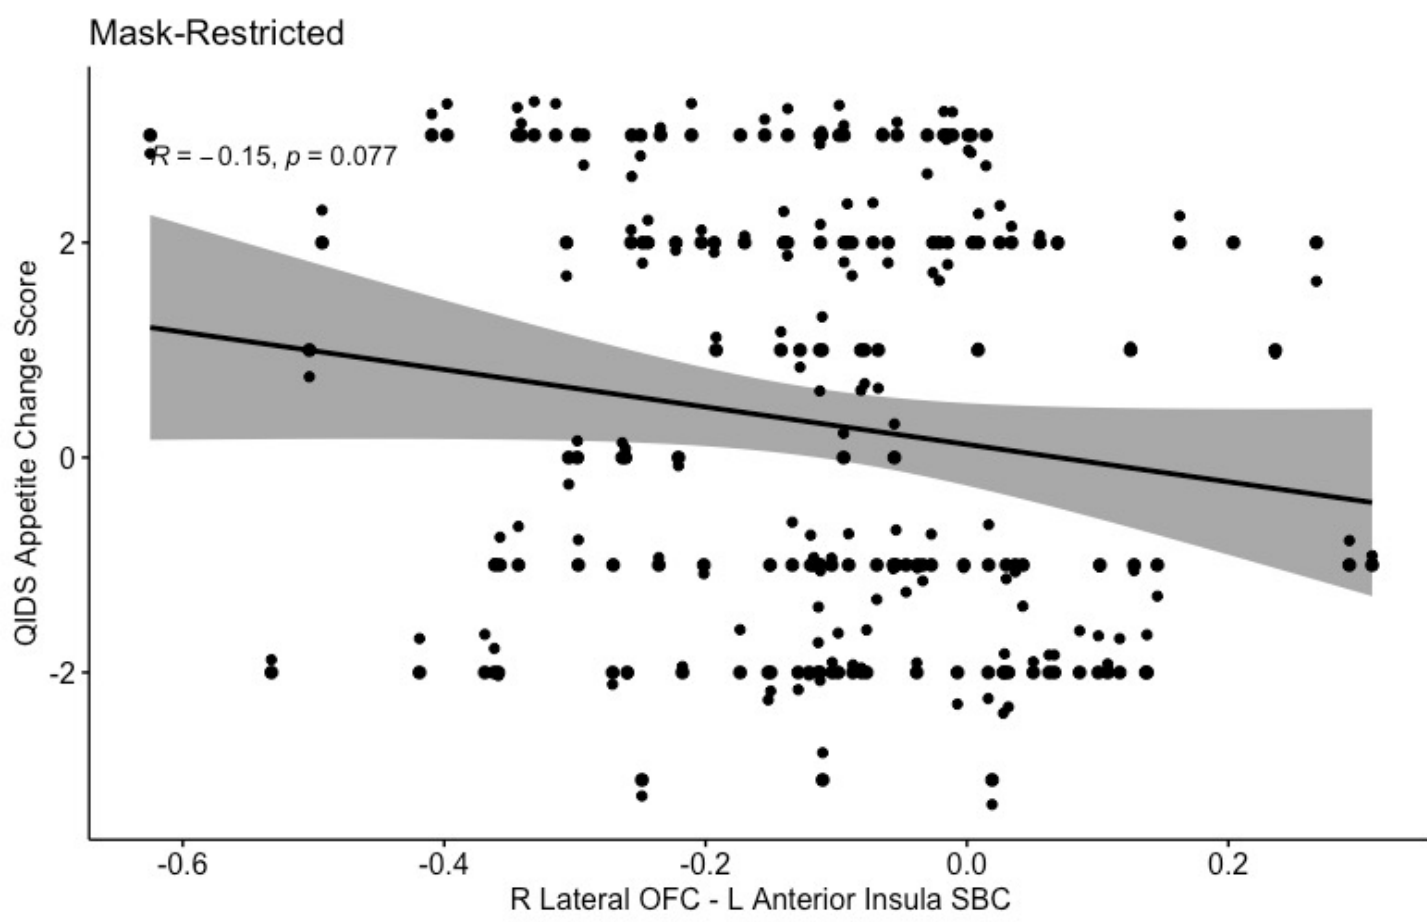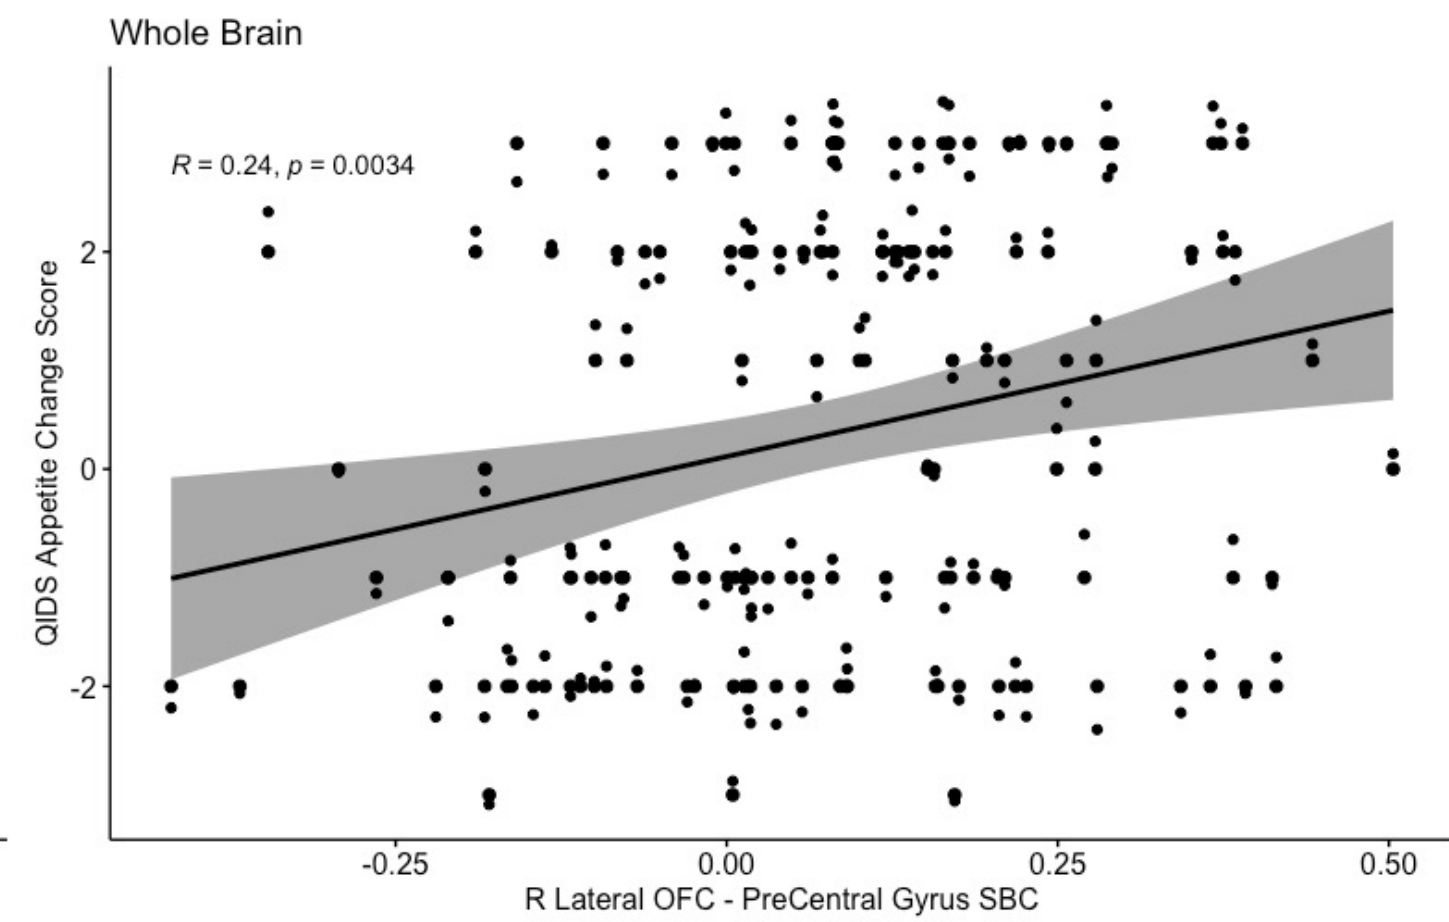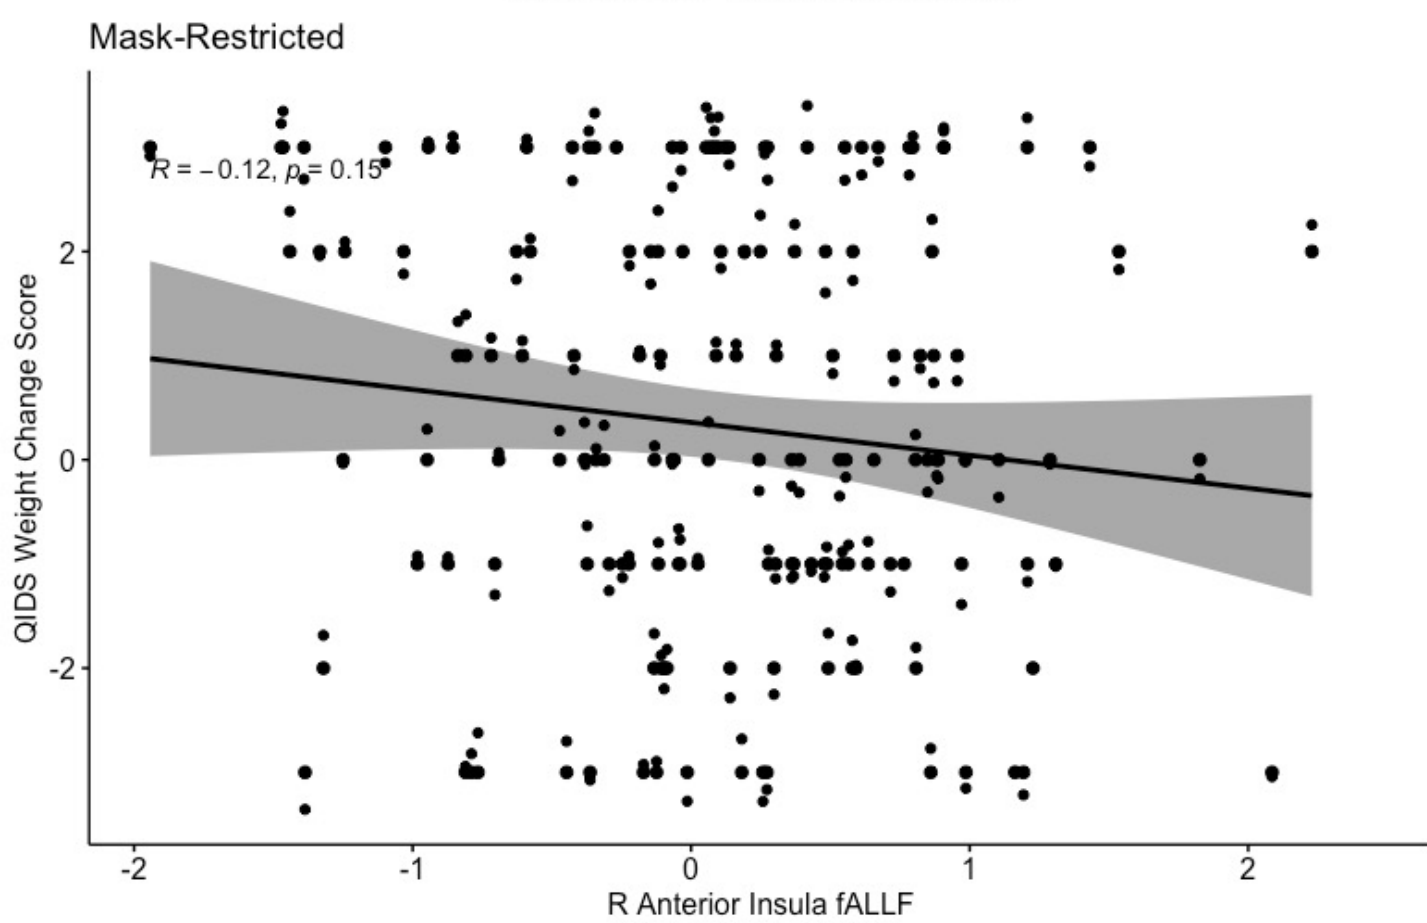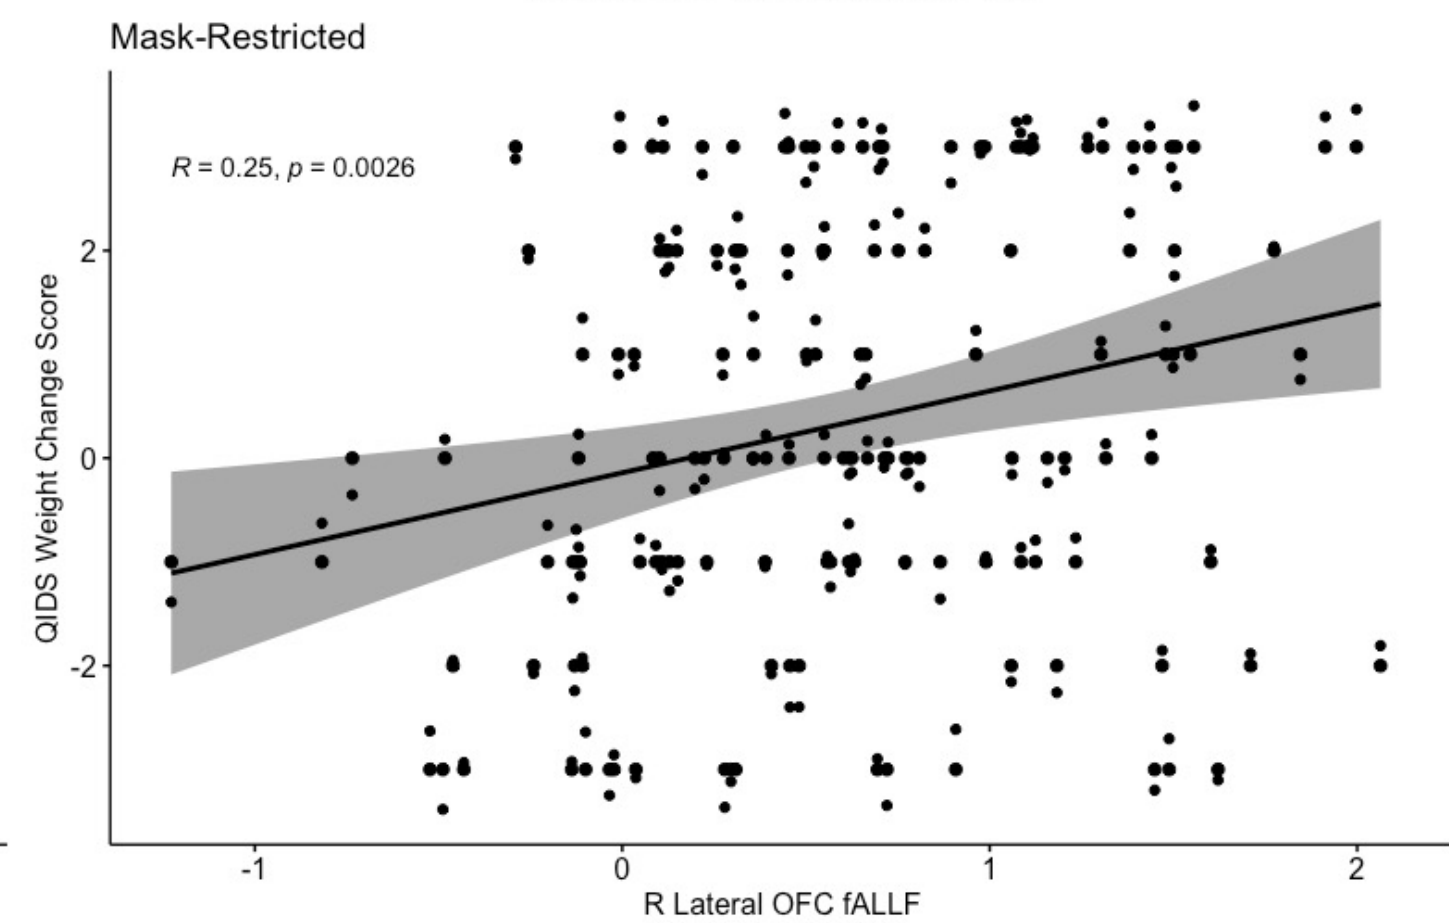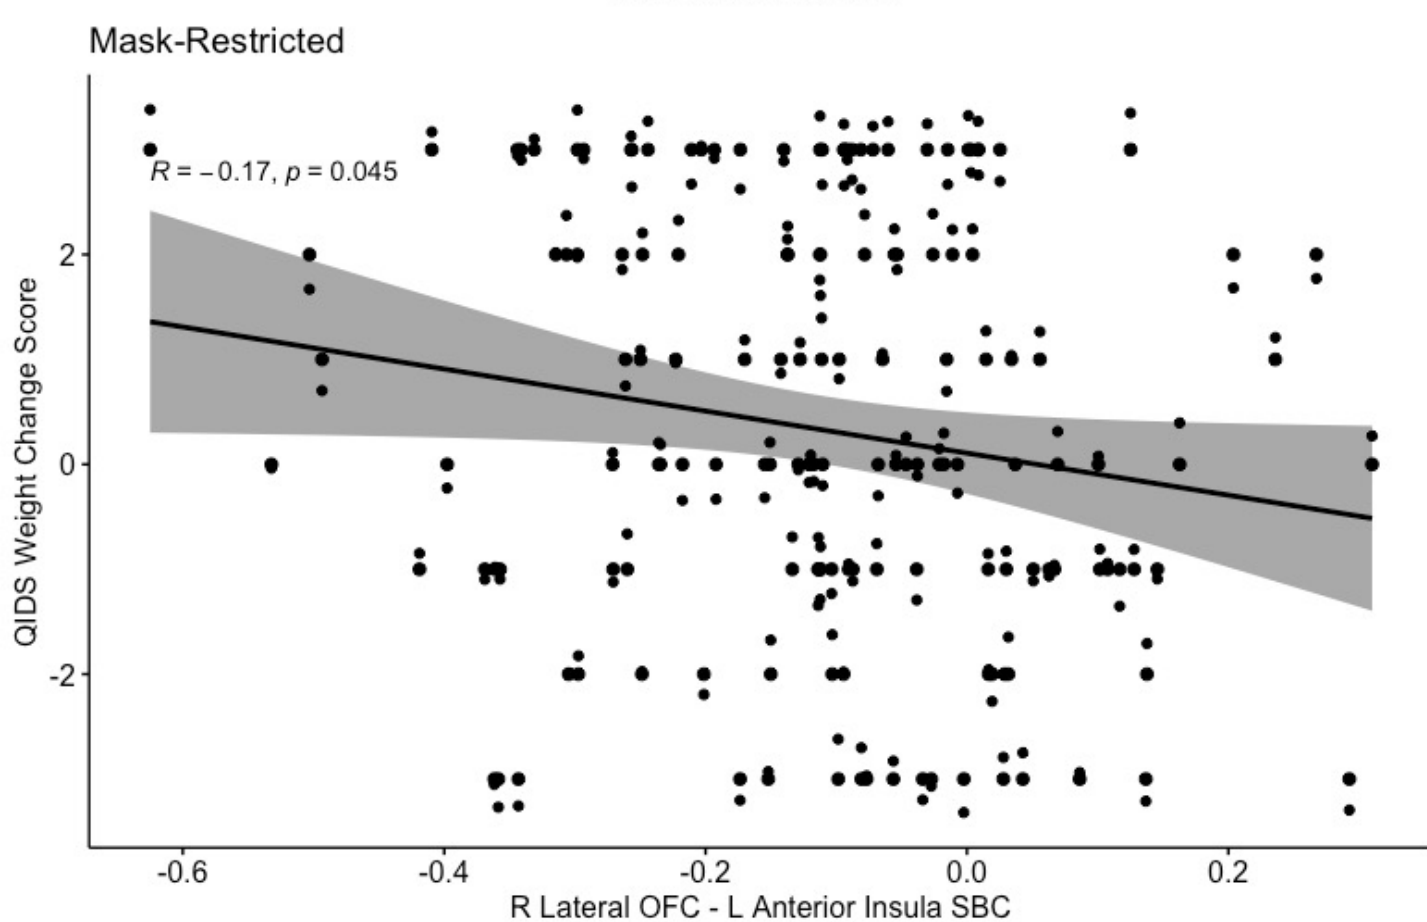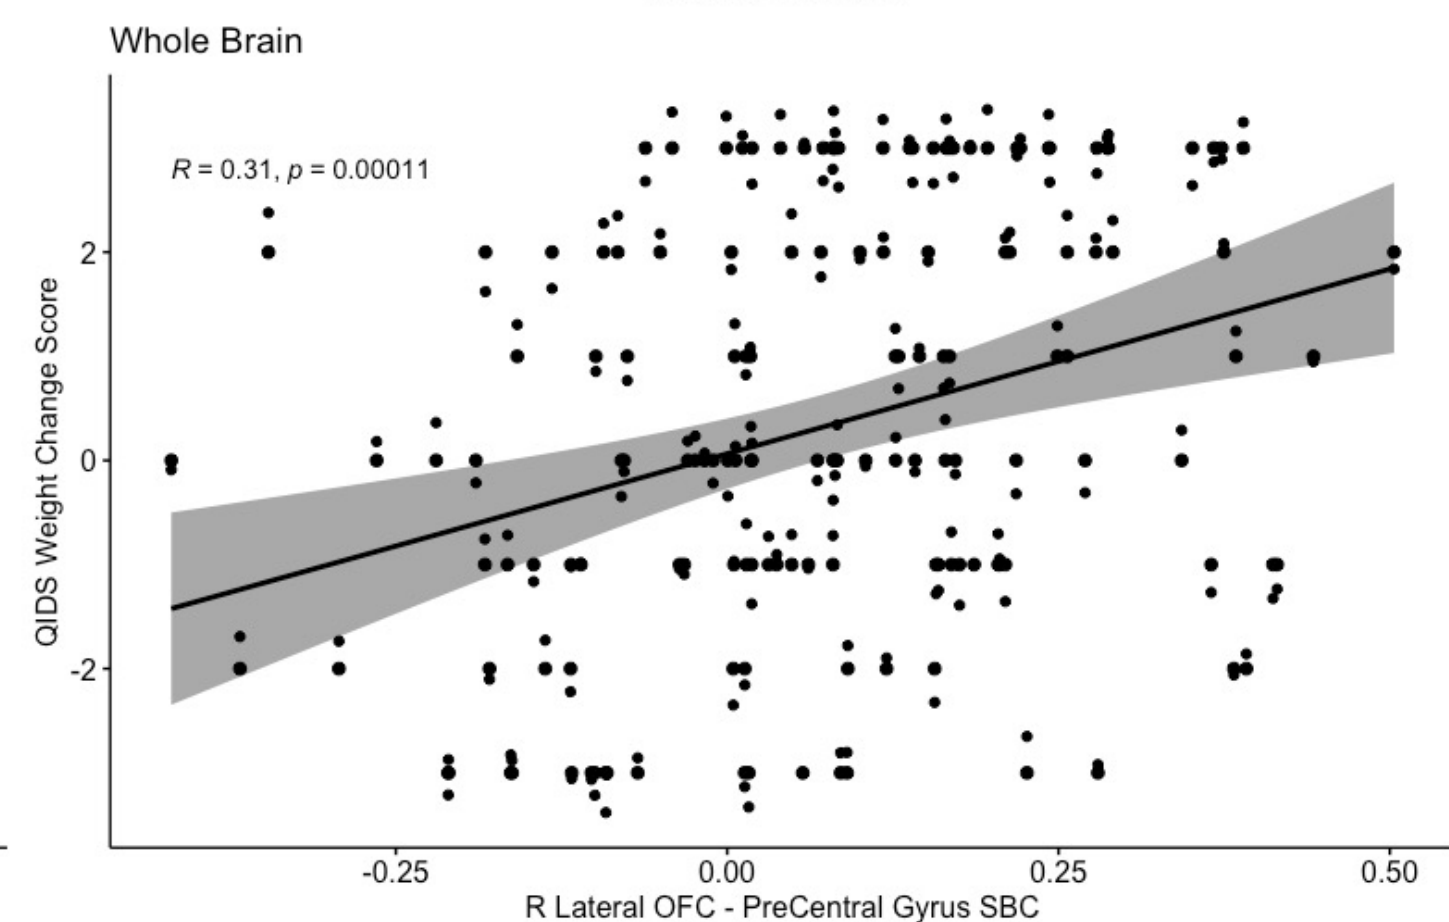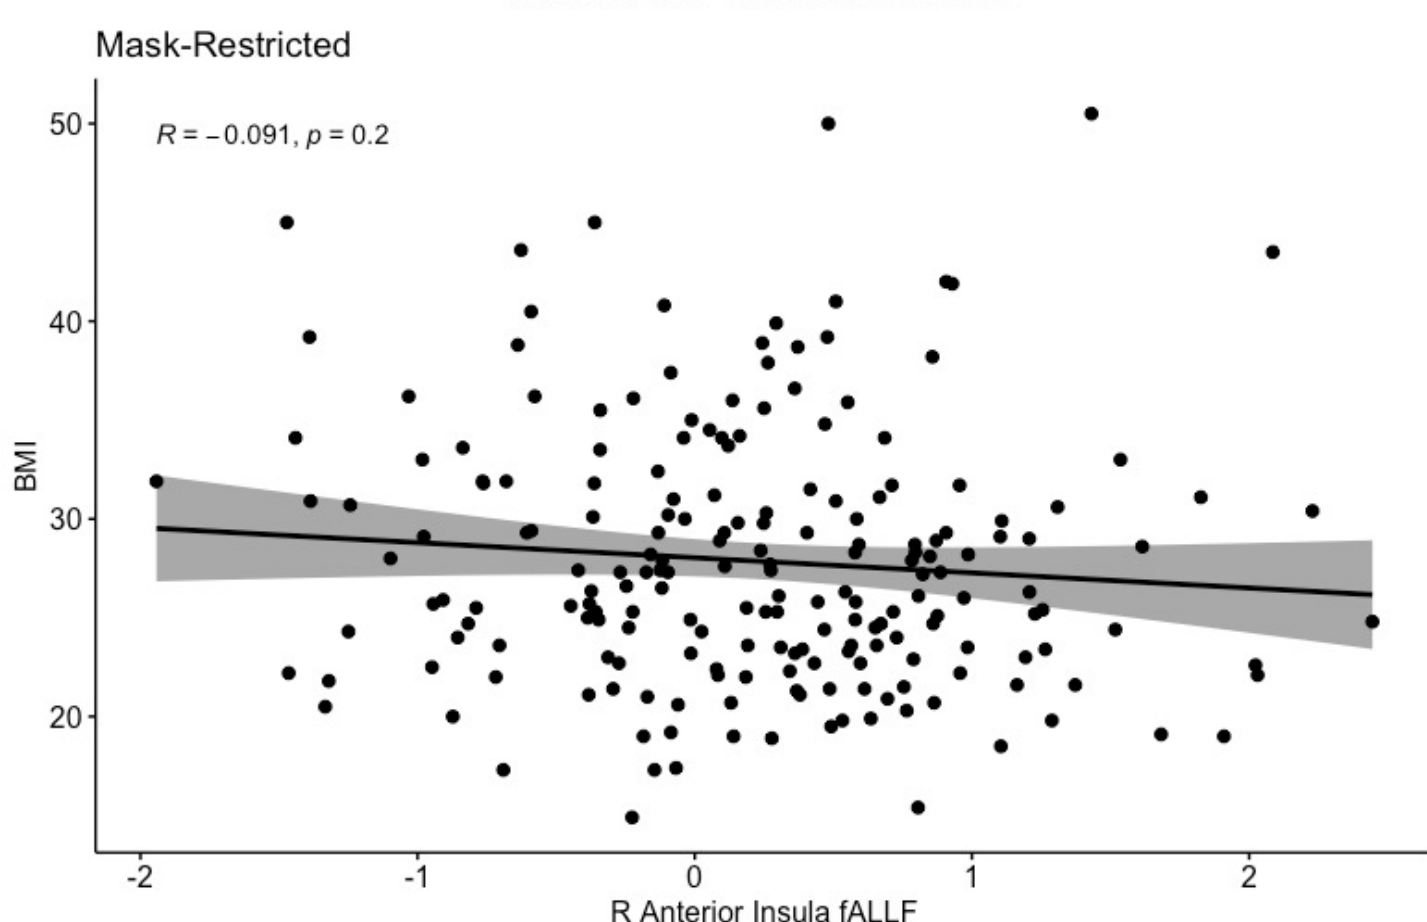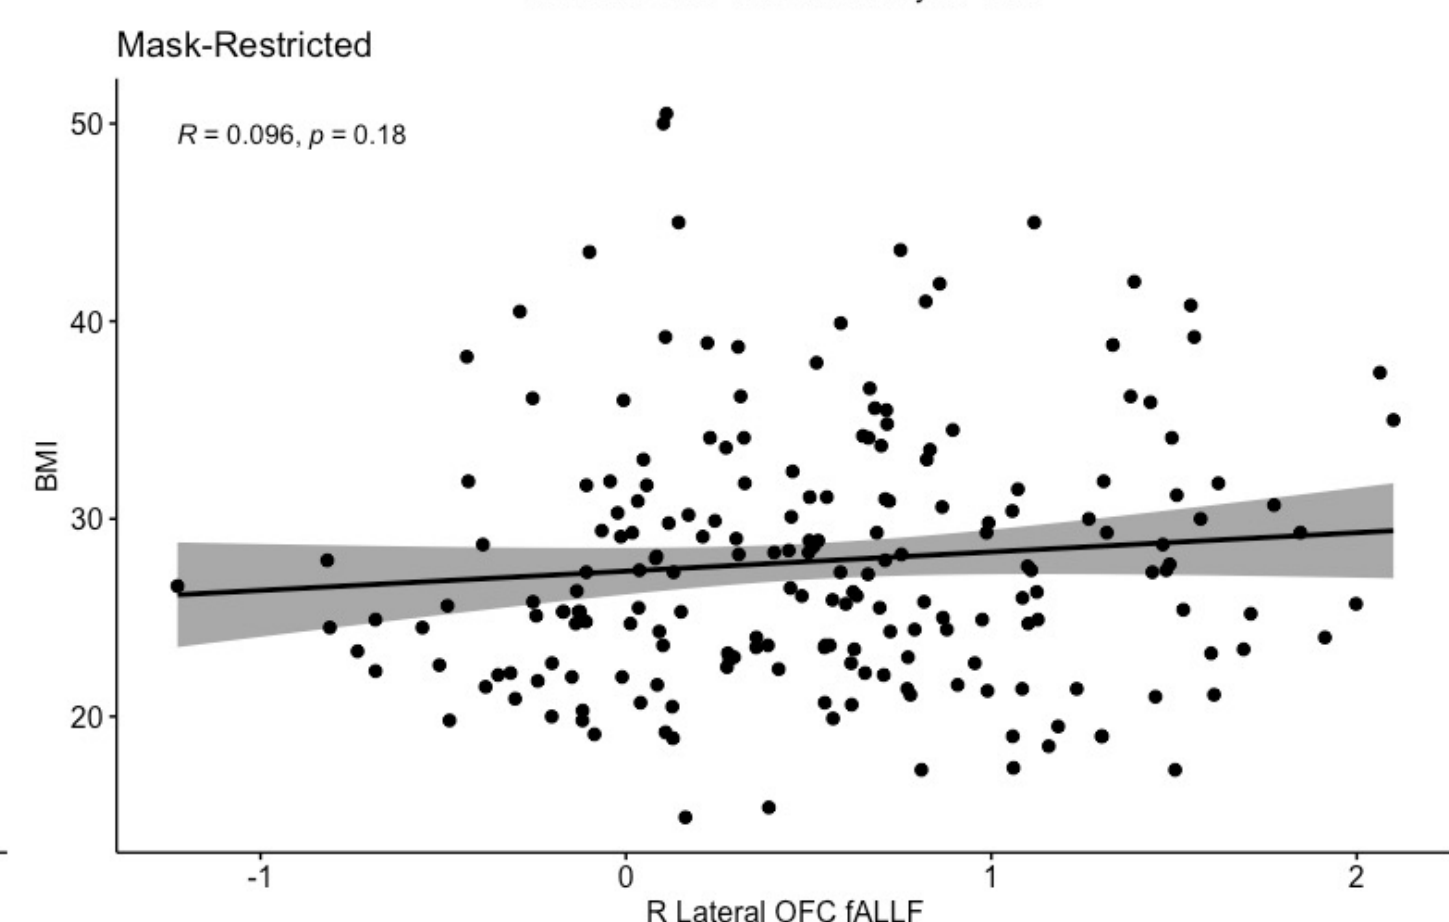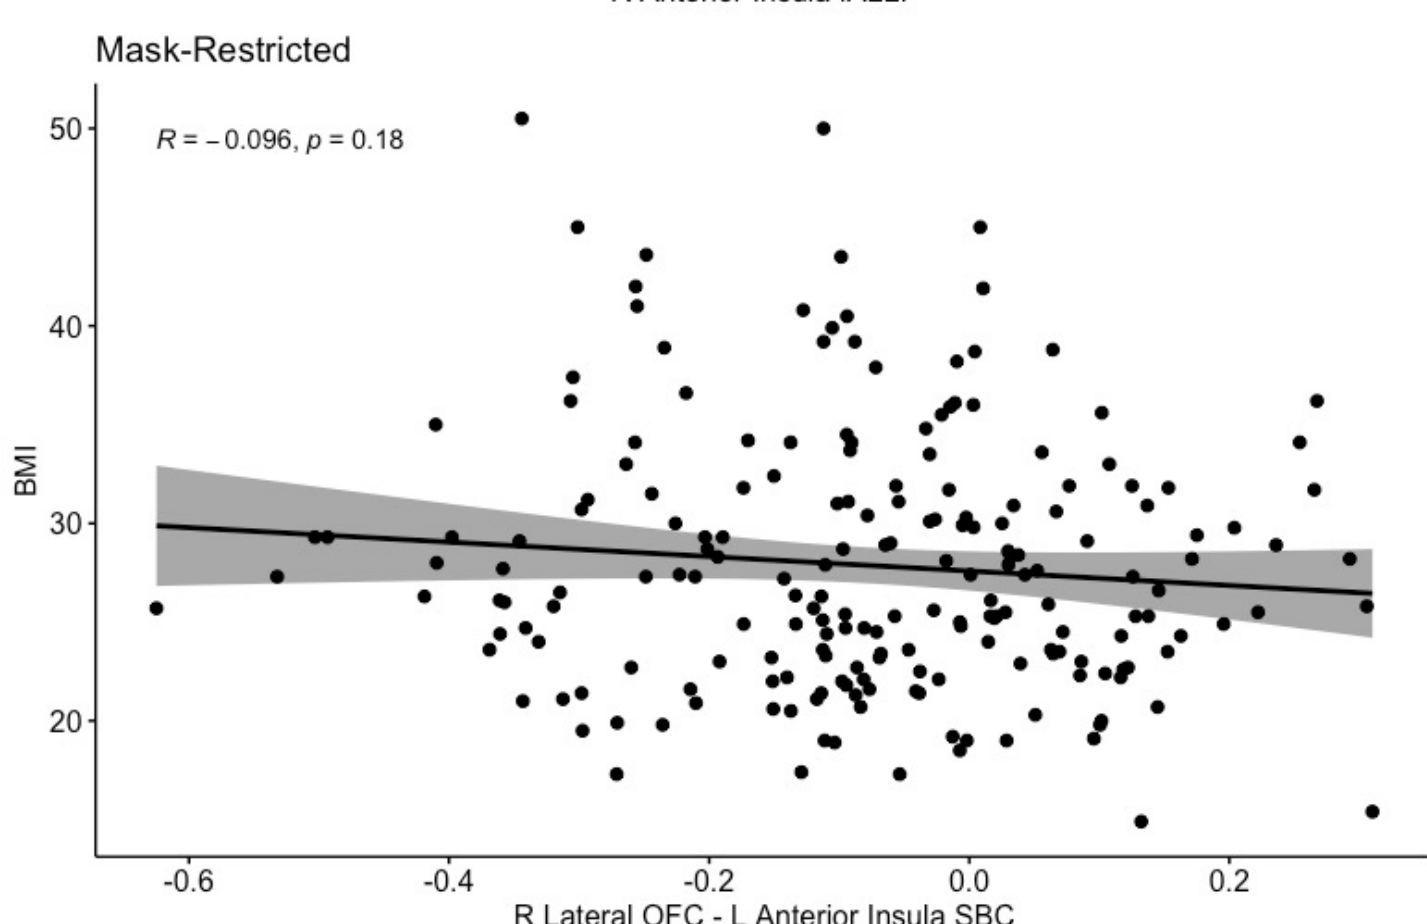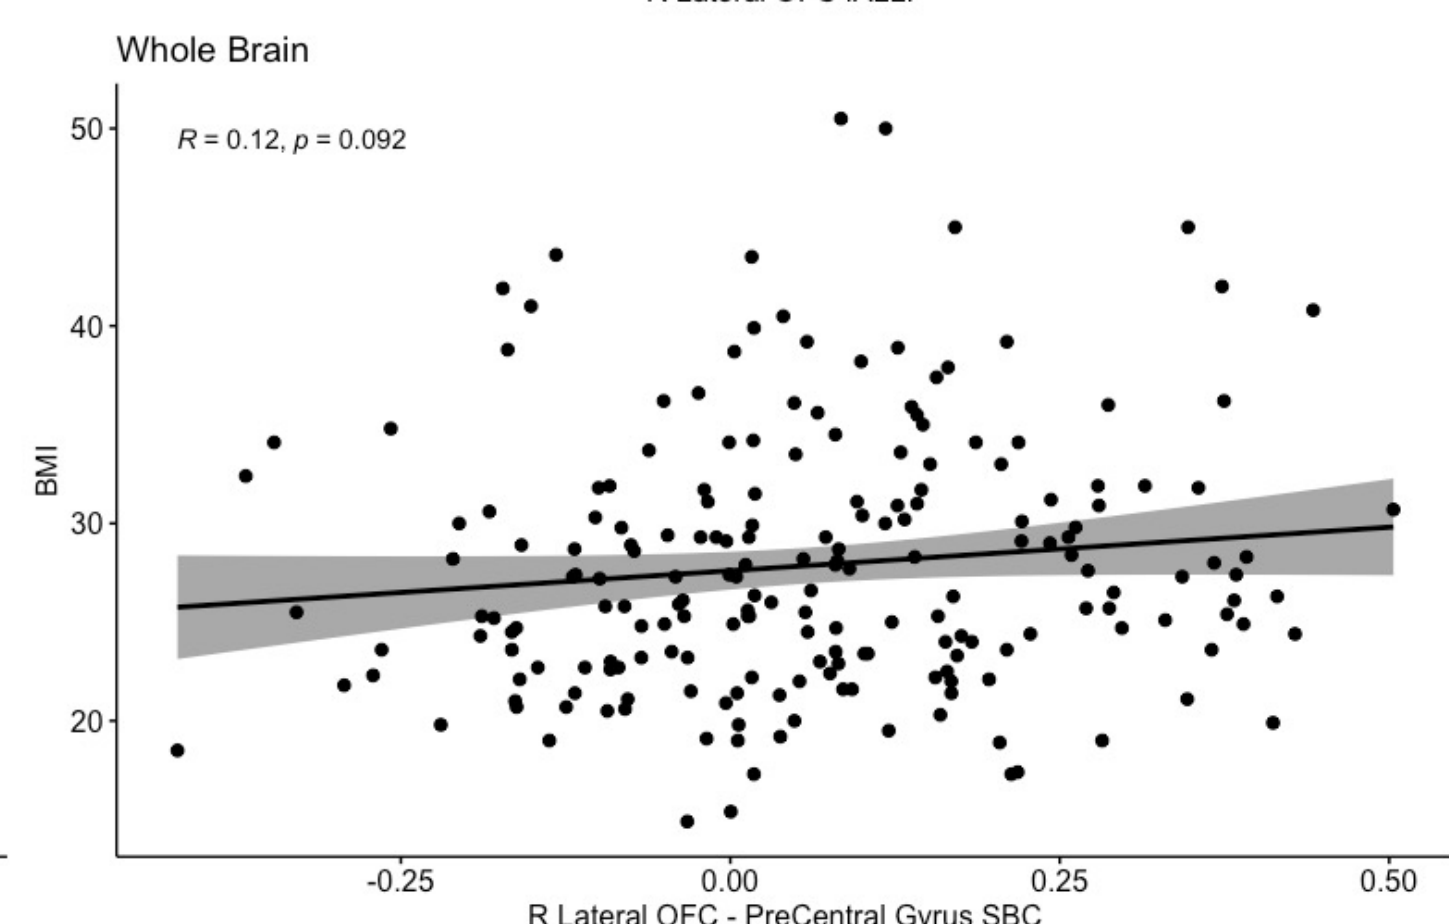

Supplement: NIHMS1874625-supplement-Supplemental_Figure_2.pdf [file NIHMS1874625-supplement-Supplemental_Figure_2.pdf]
